# Supplementary material for: Arabidopsis ERF012 Is a Versatile Regulator of Plant Growth, Development and Abiotic Stress Responses
Source: MDPI journal article supplement (doi:10.3390/ijms23126841), 2022-06-20
Supplement: s1 [file s1]

Supplementary Figure S1

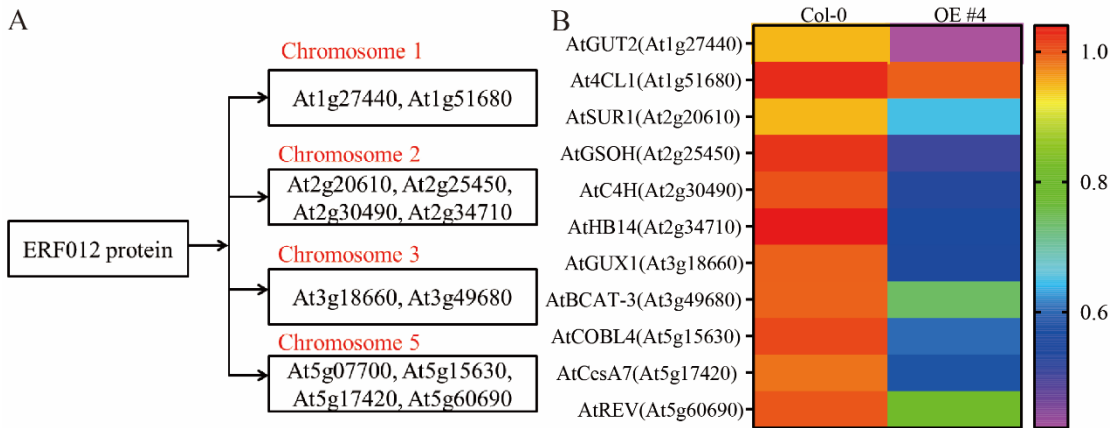

Supplementary Figure S1. ERF012 regulates the the genes involved cell wall formation. (A) The genes were were predicted to be the targets of ERF012 in the website (<https://bar.utoronto.ca/eplant/>). (B) The heatmap shows the expression of the ERF012 target genes in 12-day-old Col-0 and overexpression *ERF012* line (OE #4). Values represent means  $\pm$  SD, n=3 pools, with about 20 plant roots per pool.



## Supplement Figure S2

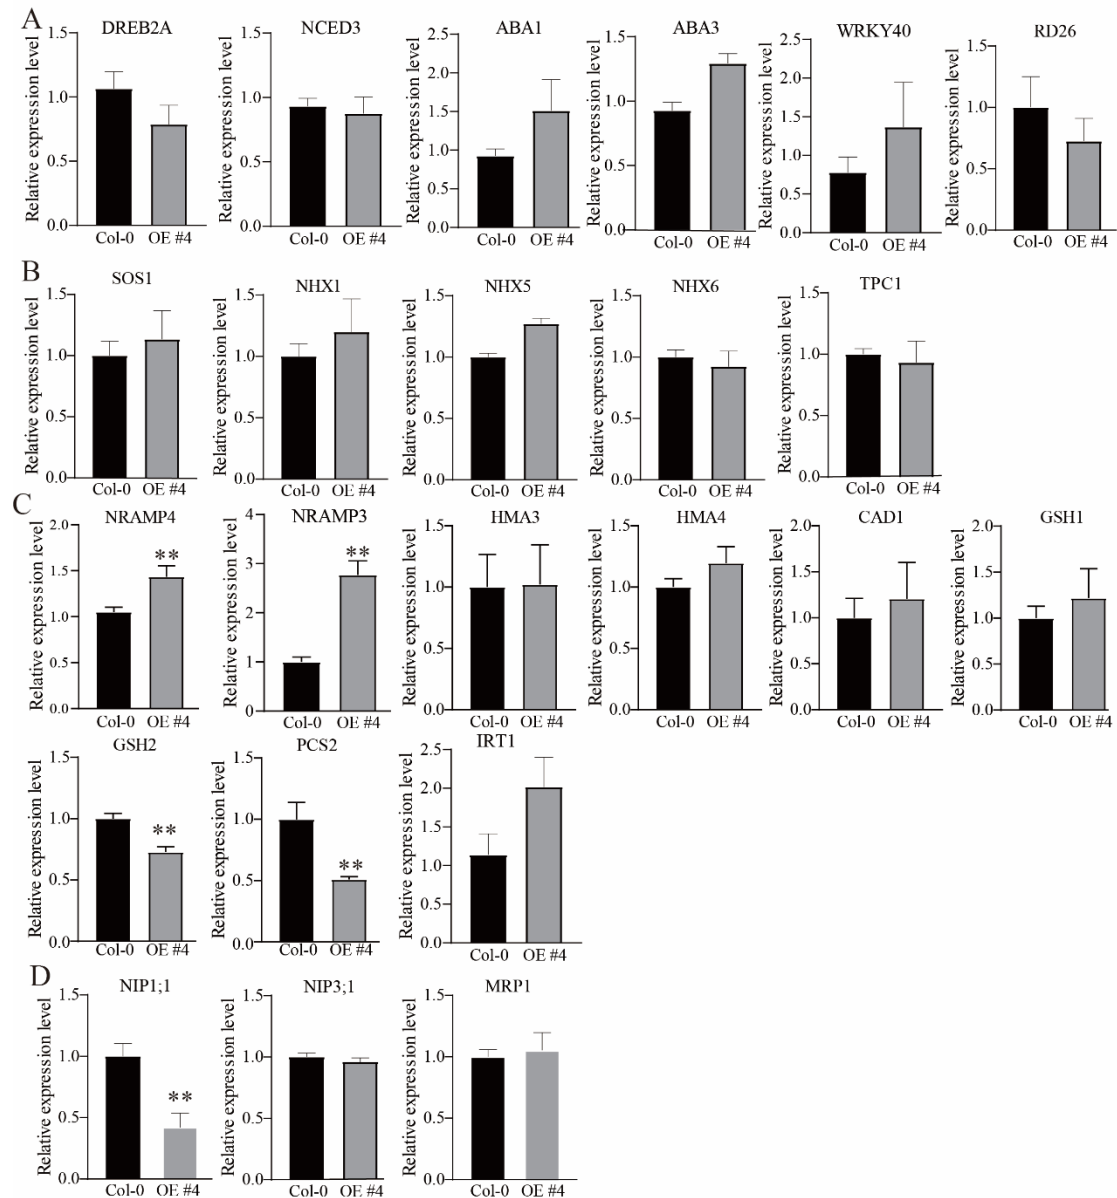

Supplementary Figure S2. *ERF012* regulates the expression of the genes involved in drought, NaCl, Cd, As. (A-D) The expression of the genes involved in drought, NaCl, Cd, As stress in 12-day-old Col-0 and overexpression *ERF012* line. Values represent means  $\pm$  SD, n=3 pools, with about 20 plant roots per pool. Asterisks indicate significant differences between different treatments: Student's *t*-test: \*\*,  $P < 0.01$ .



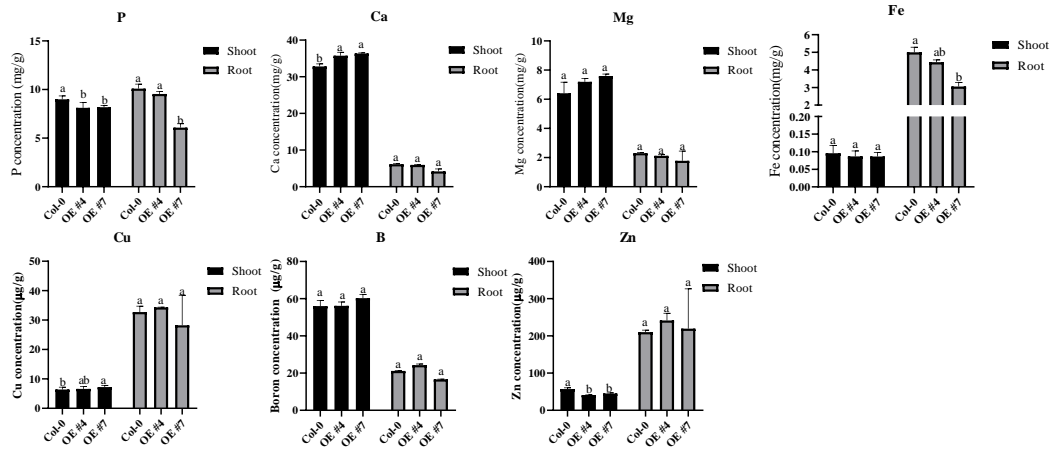

**Supplement Figure S3:** The nutrition in Col-0 and *ERF012* OE lines. The Col-0 and *ERF012* OE lines were grown in hydropic solution for 35 d. The shoots and roots were harvested and dried for nutrition detection. Values represent means  $\pm$  SD, n=3. Letters indicate significant differences between different plants: Duncan's test ( $p < 0.05$ ).

**Supplement Table S1.** The specific primers were used in the paper.

| Use              | Primers (5'->3')               |
|------------------|--------------------------------|
| RT-qAtERF012-F   | GTCGGCGTTGATGGATTGAGT          |
| RT-qAtERF012-R   | CTTGCTCTGAGCTGTTCTTGAGTATAGATC |
| RT-qAtACS7-F     | GCTCGAACCATTTCAGATAAC          |
| RT-qAtACS7-R     | AAGTGAATATTCTTGCGTACGC         |
| RT-qAtACS11-F    | CAGTTGTTTGAAGAGTAACGCA         |
| RT-qAtACS11-R    |                                |
| RT-qAtCYCB1: 1-F | CATCGTTTGGTCCGACATATTC         |
| RT-qAtCYCB1: 1-R | CGAGACGCCCCACTACTTAGACTT       |
| RT-qAtUBQ5-F     | GTGGTGCTAAGAAGAGGAAGA          |
| RT-qAtUBQ5-R     | TCAAGCTTCAACTCCTTCTT           |
| RT-qAtACTIN-F    | ACAGTGTCTGGATCGGTGGTTC         |
| RT-qAtACTIN-R    | TGCCTCATCATACTCAGCCTTG         |
| RT-qAT1G5168 0-F | TGATCCAGAGGTGTAAAGTGAC         |
| RT-qAT1G5168 0-R | AAGTTCTTTACCAAGAGGAGCA         |
| RT-qAT2G3049 0-F | GAAGTCTTTAATCGCCGTCTTC         |
| RT-qAT2G3049 0-R | TGAGATCATCTCCGACTTGAAG         |
| RT-qAT2G3049 0-F | TCCAGTTATCATAGCAGACGAC         |
| RT-qAT2G3049 0-R | TGGTATTGAGGTTAGGATCGTG         |
| RT-qAT2G3049 0-F | GAGATCTTCCGCACAAGTTAAC         |
| RT-qAT2G3049 0-R | CAATGGCTTCGATACCTTCAAG         |
| RT-qAT2G3049 0-F | CATAACCCGCATGTAAACGTAG         |
| RT-qAT2G3049 0-R | TTAACCTTCGCAACTACACTCT         |
| RT-qAT2G3049 0-F | TGTCCGATTCTCTTAACATCG          |
| RT-qAT2G3049 0-R | GGCATTGAGTTTTCTGTTCACT         |
| RT-qAT2G3049 0-F | CAAAATCATTTTCATCGACGCG         |
| RT-qAT2G3049 0-R | CATCAGAAGCTGAAACGTACAG         |



|               |                                     |
|---------------|-------------------------------------|
| AT2G20610 -F  | TATGAGAAATGGTGCTGAGAGG              |
| RT-q          | CCAACGTTTGTGTTGCTAGTACA             |
| AT2G20610-R   | GCTGGAACTACAAACAAGACTG              |
| RT-q          | GCAGGTAACATTCCATGTCATC              |
| AT2G25450 -F  | GACCTATCTAGATCGGCTTTCC              |
| RT-q          | ACTGACAAAGACATCTACAGGG              |
| AT2G25450 -R  | TAAGGCTATCTGTTCCGACTTC              |
| RT-qAT2G3471  | GCAACAGCTTGTTTCATAACTCA             |
| 0 -F          | CATGTTTGATGTCGATGAGCTT              |
| RT-qAT2G3471  | ATTCCGTAGTTGAGGCTTTGTA              |
| 0 -R          | GATGAATTTGTTCCAGAGAGCG              |
| RT-q          | AACACTAGGATCAGCCGTTTTA              |
| AT3G18660 -F  | TTGCTGAACAAGTTATGGAAGC              |
| RT-q          | CTGCTGCAGAGTCATTCTACTA              |
| AT3G18660 -R  | AATATGCATTAGCTCAAGGTGC              |
| RT-q          | GCACGATGCTTTACCTTGATAG              |
| AT3G49680 -F  | GTTGCAGCAAACAGAAGAAGTA              |
| RT-q          | AAAATCGATTCTTGACGTTGGG              |
| AT3G49680 -R  | TGTTTCACATTTGTAGGGGAGT              |
| RT-q          | ATTTCCGATCTCTTGCGCTAAA              |
| AT5G15630 -F  | ATTTTGATGCAGTCAGTGGATG              |
| RT-q          | GCAAGCAGATTCTAGTCTTTCG              |
| AT5G15630 -R  | GTTGCCCTTATGATGCTTATGG              |
| RT-qAT5G1742  | TTCTTGAGCTCTCCGTTACATT              |
| 0 -F          | CGCTTCTCATTGGTTTAATCGT              |
| RT-q          | CAGTAACAACCTGAAGCGACAAA             |
| AT5G17420 -R  | GGATATTTGGTCAATCTGGCAC              |
| RT-q          | TCTAGCATTGTACCAGTCGATC              |
| AT5G60690 -F  | TATCACAACAACCTGAGAGCCTT             |
| RT-q          | GCTTTCTTCGATATCAAGCGTT              |
| AT5G60690-R   | CTTGCAATTTGCTTGGATGTTTG             |
| RT-qAtDREB2A  | CCAACAGCTTGTTTGATAGTCC              |
| -F            | AAGAAACAGCGTACGATGAAAC              |
| RT-qAtDREB2A  | GATTCCCTGGATCTAAAAACGC              |
| -R            | ATGGTCTCGGATTTTAGGTCTC              |
| RT-qAtNCED3-  | AGAAACTGATCTTGCGTAGTCA              |
| F             | TGAAAACAACCTCTTTAGCGGG              |
| RT-qAtNCED3-  | GACAACCACTGACTAACACAAC              |
| R             | GTTACATCTGATGTTTCGGCTTC             |
| RT-qAtABA1-F  | CGTGAACAGTCAATATCAGCAG              |
| RT-qAt ABA1-R | CTTG TGCTGAAGTCAATTCACA             |
| RT-qAt ABA3-F | TTGGCATGATGGGTATATCCTC              |
| RT-qAt ABA3-R | GAGGACATTCGTTTGGGTTTAC              |
| RT-qAtWRKY4   | GAAGCAATGACTGATGTAGCTG              |
| 0-F           | TCACTTCCAGCAAATTTCAACC              |
| RT-qAtWRKY4   | CGTACACAGAGGAGAGAACTT               |
| 0-R           | GCTTCAAATTCAGCACTTCTCA              |
| RT-qAt RD26-F | GTTGAAGTTGCTGGAGAGATTG              |
| RT-qAt RD26-R | GACTTGATCACGACGTTTGTAG              |
| RT-qAt SOS1-F | GATAAACTCCATCGTAAACGCC              |
| RT-qAt SOS1-R | TTCCATCTAGACGACGATGTTT              |
| RT-qAt NHX1-F | GAGGTCTGATTTGAGTTTGACG              |
| RT-qAt NHX1-R | CAAGCATATGCATCTACGATGG              |
| RT-qAt NHX5-F | AACTATTCTCAGCTAGACTCGC              |
| RT-qAt NHX5-R | ATCCCCGGGCTGCAGGAATTCATGGTGAAACAA   |
| RT-qAt NHX6-F | GAACGCA                             |
| RT-qAt NHX6-R | CGATAAGCTTGATATCGAATTCTTAATTGAAACTC |
| RT-qAt TPC1-F | CAAAGCGGAATG                        |
| RT-qAt TPC1-R |                                     |
| RT-qAt        |                                     |



|                |                                          |
|----------------|------------------------------------------|
| NRAMP4-F       |                                          |
| RT-qAt         |                                          |
| NRAMP4-R       |                                          |
| RT-qAt         |                                          |
| NRAMP3-F       |                                          |
| RT-qAt         |                                          |
| NRAMP3-R       |                                          |
| RT-qAt HMA3-F  |                                          |
| RT-qAt         |                                          |
| HMA3-R         |                                          |
| RT-qAt HMA4-F  |                                          |
| RT-qAt HMA4-R  |                                          |
| RT-qAt CAD1-F  |                                          |
| RT-qAt CAD1-R  |                                          |
| RT-qAt GSH1-F  |                                          |
| RT-qAt GSH1-R  |                                          |
| RT-qAt GSH2-F  |                                          |
| RT-qAt GSH2-R  |                                          |
| RT-qAt PCS2-F  |                                          |
| RT-qAtPCS2-R   |                                          |
| RT-qAt IRT1-F  |                                          |
| RT-qAt IRT1-R  |                                          |
| RT-qAt         |                                          |
| NIP1;1-F       |                                          |
| RT-qAt         |                                          |
| NIP1;1-R       |                                          |
| RT-qAt         |                                          |
| NIP3;1-F       |                                          |
| RT-qAt         |                                          |
| NIP3;1-R       |                                          |
| RT-qAt MRP1-F  |                                          |
| RT-qAt MRP1-R  |                                          |
| GAL4DB-ERF0    |                                          |
| 12-F           |                                          |
| GAL4DB-ERF0    |                                          |
| 12-R           |                                          |
|                | TCCCCCGGGATGGTGAAACAAGAACGCAAGATC        |
|                | C                                        |
| OE-ERF012-F    | CCGCTCGAGTTAATTGAAACTCCAAAGCGGAATG       |
| OE-ERF012-R    | T                                        |
| pERF012-F      | ggtcgacggatccccGTCATTTGTTGGGAACTGGTACGGA |
| pERF012-R      | AGGGACTGACCACCCTGTGTACGTACAGGCTTTG       |
| AT1G51680-his2 | TAGAGTG                                  |
| -F             | atagggcgaattcccGTTGAAGGATGAGTTTGGTGAAGG  |
| AT1G51680-his2 | CT                                       |
| -R             | acgcgtgagctccccAGGCTTTGGCCTGAAGGAAACA    |
| AT2G30490-his2 | atagggcgaattcccGACCAACGAAATTCGGCATAACGTG |
| -F             | acgcgtgagctccccGAAATGAGGACCAACGGCAAAAAG  |
| AT2G30490-his2 | G                                        |
| -R             | TCCCCCGGGATGGTGAAACAAGAACGCAAGATC        |
| ERF012-rec2-F  | C                                        |
| ERF012-rec2-R  | CCGCTCGAGTTAATTGAAACTCCAAAGCGGAATG       |
| ERF012-DT2-R   | T                                        |
| 0              | ATATATGGTCTCGATTGGTTGAGGAGAGTAATTGA      |
| ERF012-DT1-F0  | AGTT                                     |
| ERF012-DT2-R   | TGGTTGAGGAGAGTAATTGAAGTTTTAGAGCTAG       |
| 0              | AAATAGC                                  |
| ERF012-DT2-Bs  | AACCGTCTTCGTCTTCGTGTAACAATCTCTTAGTC      |
| R              | GACTCTAC                                 |
|                | AACCGTCTTCGTCTTCGTGTAACAATCTCTTAGTC      |

---



---

GACTCTAC

---

| Use                               | Primers (5'→3') |                                             |
|-----------------------------------|-----------------|---------------------------------------------|
|                                   | ERF18-F         | TCCCCCGGGATGGTGAAGCAAGCGATGAAG<br>GAAGA     |
|                                   | ERF18-R         | CCGCTCGAGCGCGCTCAAAAATCCCAAAGAAT<br>CAAAGA  |
| Transgenic<br>plants              | ERF12-F         | TCCCCCGGGATGGTGAACAAGAACGCAAG<br>ATCC       |
|                                   | ERF12-R         | CCGCTCGAGTTAATTGAAACTCCAAAGCGGAA<br>TGT     |
|                                   | ERF18-F         | TCCCCCGGGATGGTGAAGCAAGCGATGAAG<br>GAAGA     |
|                                   | ERF18-R         | CCGCTCGAGCGCGCTCAAAAATCCCAAAGAAT<br>CAAAGA  |
|                                   | A-AOCX3-F       | TCCCCCGGGAGTTGCTGATAAAAAAAAAA<br>GAGTGG     |
|                                   | A-AOC3-R        | CCGCTCGAGCTTGGTCGGTTCGGTTGTGTCAA<br>TTTG    |
|                                   | C-AOC1-F        | TCCCCCGGGTTCATCTAACAAACTATTATC              |
|                                   | C-AOC1-R        | CCGCTCGAG GAGTTTTACGAAATGTCTATGTG           |
| Yeast One<br>Hybrid               | ERF12-F         | TCCCCCGGGATGGTGAACAAGAACGCAAG<br>ATCC       |
|                                   | ERF12-R         | CCGCTCGAGTTAATTGAAACTCCAAAGCGGAA<br>TGT     |
|                                   | ERF18-F         | CCGGAATTCATGGTGAAGCAAGCGATGAAGG<br>AAGA     |
|                                   | X2-ERF18-R      | GCTCTAGAAAAATCCCAAAGAATCAAAGA               |
|                                   | 121-AOC1-F      | CTCAAGATCAGAAGTATGTGGCAATGAGGTTT<br>AGAATGG |
|                                   | 121-AOC1-R      | AGGGACTGACCACCCAGATGGGACTTTGGTTT<br>TATGTGG |
|                                   | 121-OPR3-F      | CTCAAGATCAGAAGTAGTAACTCAGGGCTCAC<br>AAATGG  |
|                                   | 121-OPR3-R      | AGGGACTGACCACCCGTTGTGTGGTCGTGGA<br>AATGGA   |
| Transient<br>Expression<br>Assays | 121-AOS-F       | CTCAAGATCAGAAGTACGAACGCTTGGGACGT<br>GTTTT   |
|                                   | 121-AOS-R       | AGGGACTGACCACCCACAGTGGCGAGTGTTG<br>TGATTG   |
|                                   | 121-AOC3-F      | CTCAAGATCAGAAGTTCGTTTGGACGTTGGTA            |



121-AOC3-R

CAC  
AGGGACTGACCACCCCCACTCGGTTTCGAATT  
GTCT

---

---

---
